# Supplementary material for: Incorporation of methylene blue into mesoporous silica nanoparticles for singlet oxygen generation
Source: Royal Society of Chemistry journal article supplement (doi:10.1039/d2nj04835c), 2022-12-08
Supplement: d2nj04835c1.pdf [file d2nj04835c1.pdf]

# ELECTRONIC SUPPORTING INFORMATION

---

## New Journal of Chemistry

### Incorporation of methylene blue into mesoporous silica nanoparticles for singlet oxygen generation

Jianan Xu,<sup>a</sup> Tristan Pelluau,<sup>b</sup> Cyrille Monnereau,<sup>a</sup> Yannick Guari,<sup>b</sup> Laurent Bonneviot,<sup>a</sup> Montserrat Rodríguez-Pizarro,<sup>\*c</sup> and Belén Albela<sup>\*a</sup>

### Syntheses of LUS materials (type MCM-41)

**Synthesis of p<sub>wa</sub>-MB@LUS.** First, LUS-TMA (MCM-41 type of silica with tetramethylammonium ions) was prepared according to previous works from our group.<sup>1,2</sup> Then 1g LUS-TMA and 4mg methylene blue trihydrate were dissolved in 50 mL water and stirred at 80 °C for 1h. The solution was filtered and washed twice with 50ml water for 3 times. The solid was dried at 80°C overnight.

**Synthesis of p<sub>cy</sub>-Ph@LUS.** 1g LUS-TMA was heated to 130 °C under Ar. When the temperature reached 130 °C, the solid was kept under vacuum for 1h and then cooled to RT under Ar, yielding activated LUS-TMA. Then cyclohexane (15 mL) was added to the solid, followed by 0.026 mL of phenethyltrimethoxysilane. Afterwards more cyclohexane (45 mL) was added and the solution was stirred at 80 °C for 18h. Upon cooling, the mixture was filtered and the obtained solid was washed twice with 20 mL of cyclohexane, 20 mL of technical ethanol and 20 mL of acetone. The solid was dried at 80°C overnight.

**Synthesis of p<sub>wa</sub>,p<sub>cy</sub>-[0.1MB/Ph]@LUS.** 0.5g p-Ph<sub>cy</sub>@LUS and 2mg methylene blue trihydrate were dissolved in water (25 mL). The solution was stirred at 80 °C for 1h and then filtered and washed twice with 25mL water for 3 times. The solid was dried at 80°C overnight.

**Synthesis of p<sub>wa</sub>,p<sub>cy</sub>-[0.01MB/Ph]@LUS.** The synthesis was similar to that of p<sub>wa</sub>,p<sub>cy</sub>-[0.1MB/Ph]@LUS but using p<sub>cy</sub>-Ph@LUS prepared with a ten-fold amount (0.26 mL) of phenethyltrimethoxysilane.

**Synthesis of p<sub>cy</sub>,p<sub>cy</sub>-[0.1MB/Ph]@LUS.** The same procedure as for the synthesis of p-Ph@LUS was first followed. Then 4 mg methylene blue trihydrate were added into the mixture and stirred at 80 °C for another 5h. Then the sample was filtered and washed twice with 20 mL of cyclohexane, 20 mL of technical ethanol and 20 mL of acetone. The solid was dried at 80°C overnight.

---

<sup>1</sup> B. Garcia-Cirera, M. Corbella, L. Bonneviot and B. Albela, *Microporous Mesoporous Mater.*, 2018, **261**, 150-157

<sup>2</sup> K. Zhang, B. Albela, M. Y. He, Y. M. Wang and L. Bonneviot, *Physical Chemistry Chemical Physics*, 2009, **11**, 2912-2921.

## Figures

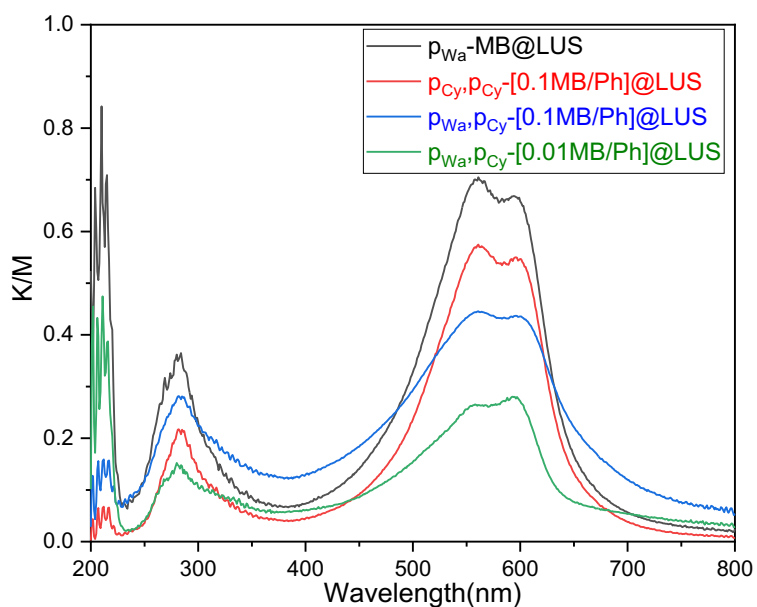

**Fig. S1** Solid UV-Vis spectra of  $p_{Wa}$ -MB@LUS,  $p_{Cy}, p_{Cy}$ -[0.1MB/Ph]@LUS,  $p_{Wa}, p_{Cy}$ -[0.1MB/Ph]@LUS and  $p_{Wa}, p_{Cy}$ -[0.01MB/Ph]@LUS.

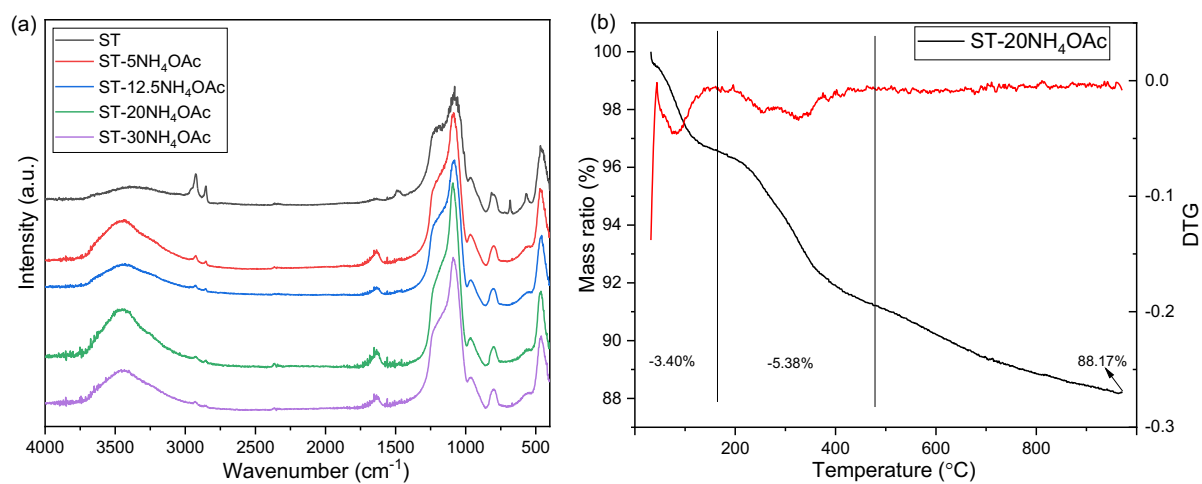

**Fig. S2** (a) IR spectra of ST, ST-5NH<sub>4</sub>OAc, ST-12.5NH<sub>4</sub>OAc, ST-20NH<sub>4</sub>OAc and ST-30NH<sub>4</sub>OAc; (b) TGA analysis of ST-20NH<sub>4</sub>OAc.

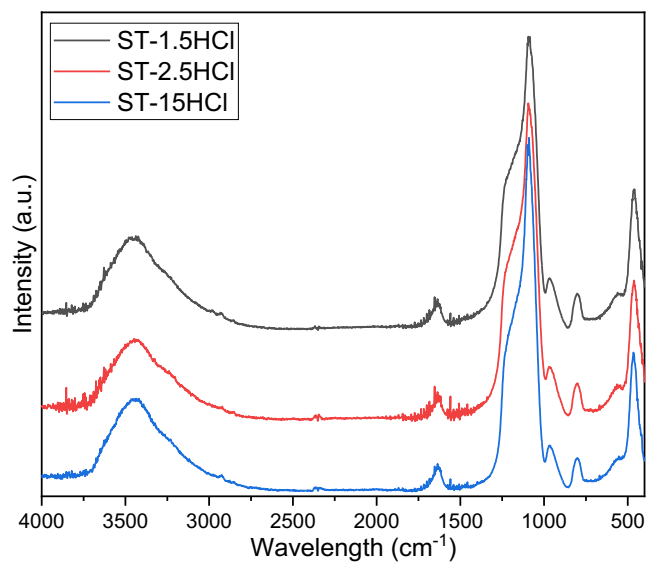

**Fig. S3** IR spectra of extracted samples using HCl in EtOH/H<sub>2</sub>O: ST-1.5HCl, ST-2.5HCl and ST-15HCl.

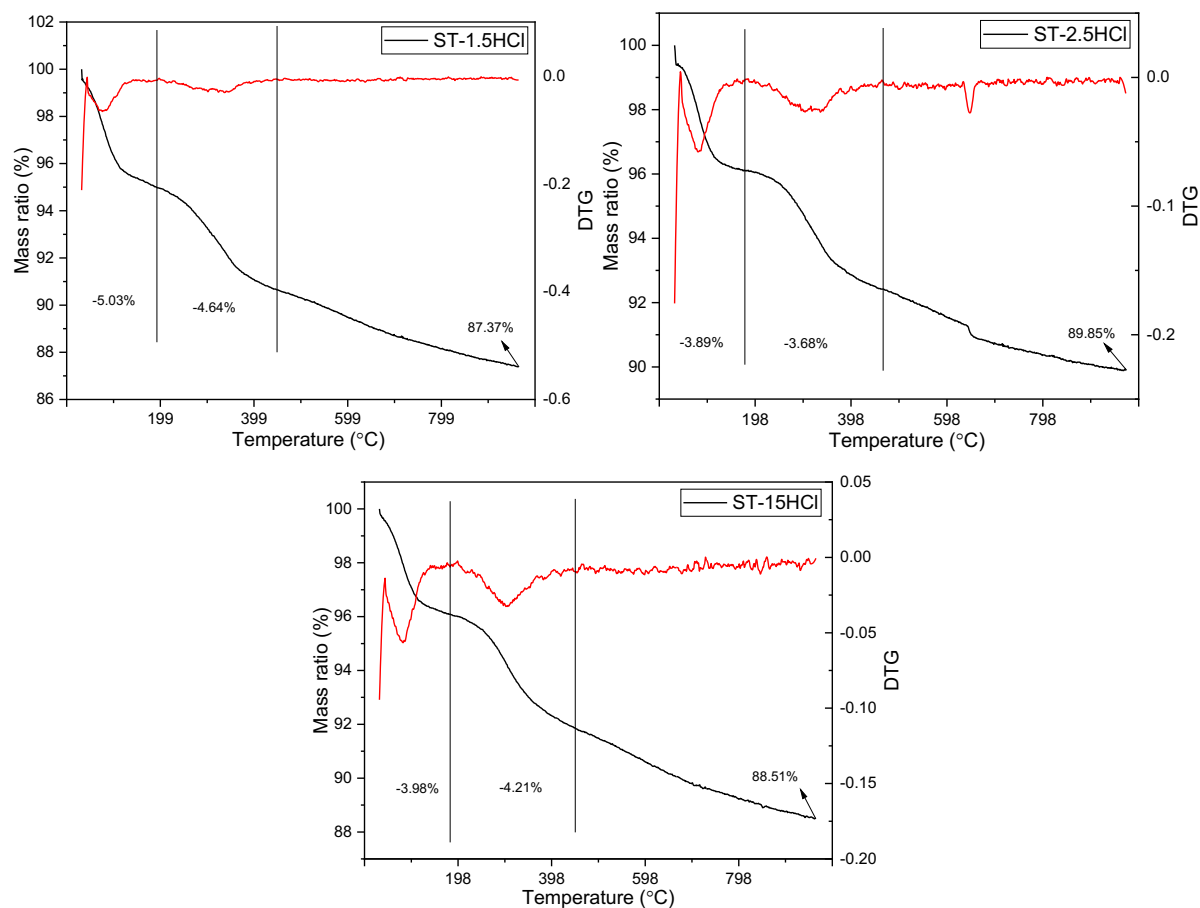

**Fig. S4** TGA profiles of extracted samples using HCl in EtOH/H<sub>2</sub>O: ST-1.5HCl, ST-2.5HCl and ST-15HCl.

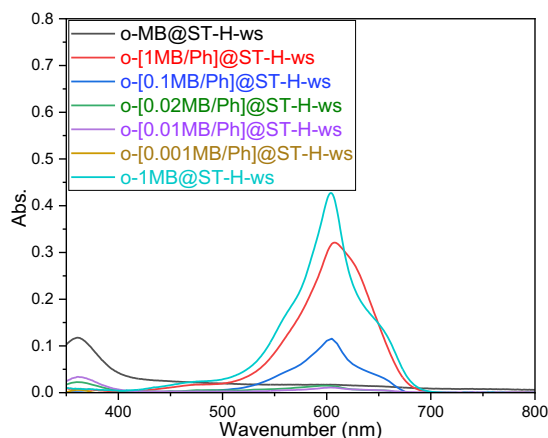

**Fig. S5** UV-visible spectra of the solutions after extraction of the surfactant (HCl in a mixture of EtOH and H<sub>2</sub>O) on “one-pot” samples.

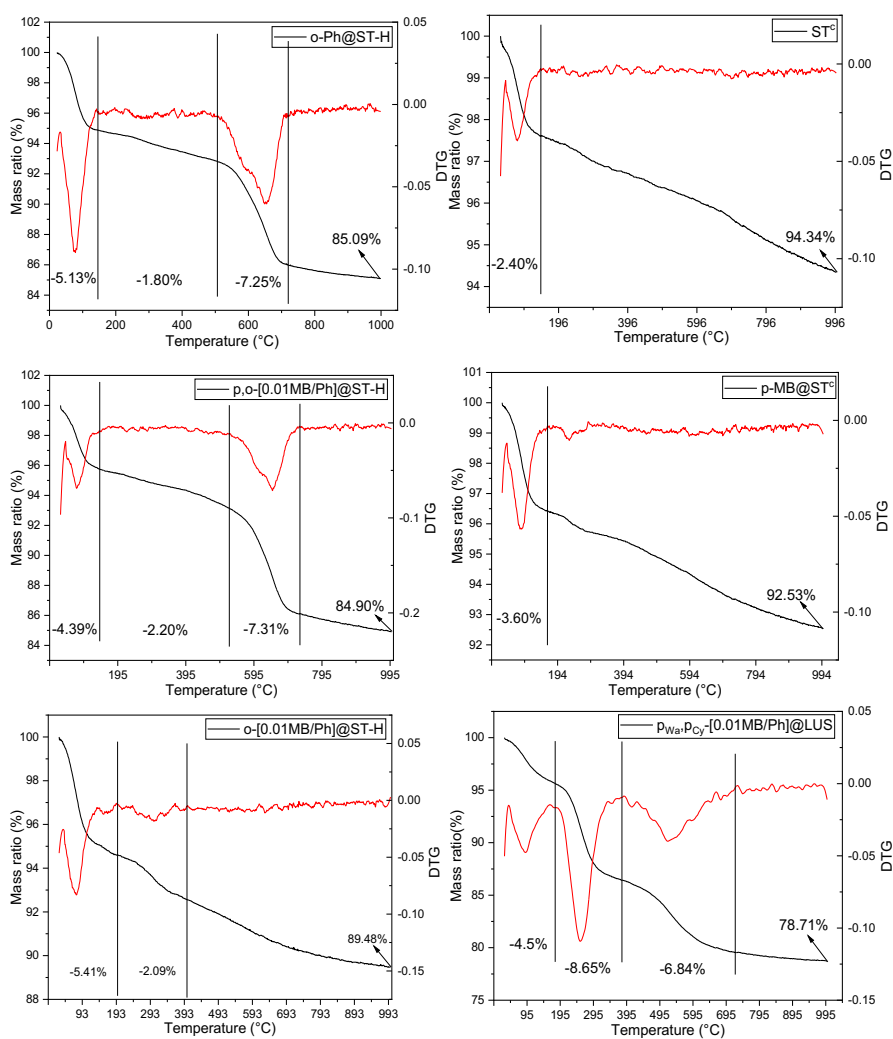

**Fig. S6** TGA of o-Ph@ST-H, ST<sup>c</sup>, p,o-[0.01MB/Ph]ST-H, p-MB@ST<sup>c</sup>, o-[0.01MB/Ph]@ST-H and p<sub>w</sub>,p<sub>C</sub>-[0.01MB/Ph]@LUS

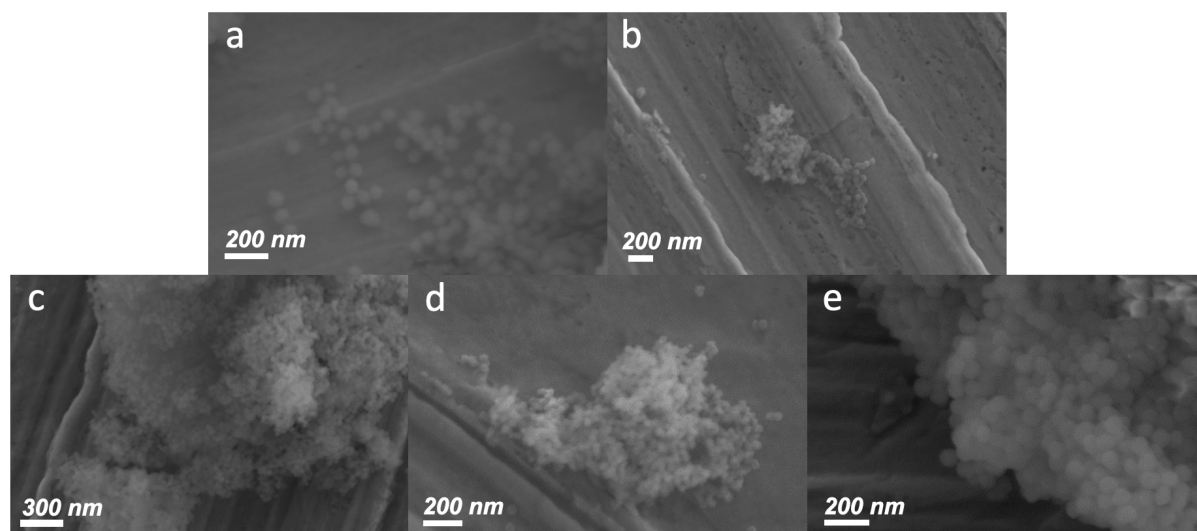

**Fig. S7** SEM images of (a) o-Ph@ST-H, (b) o-[1MB/Ph]@ST-H, (c) o-[0.1MB/Ph]@ST-H, (d) o-[0.02MB/Ph]@ST-H and (e) o-[0.01MB/Ph]@ST-H.

---

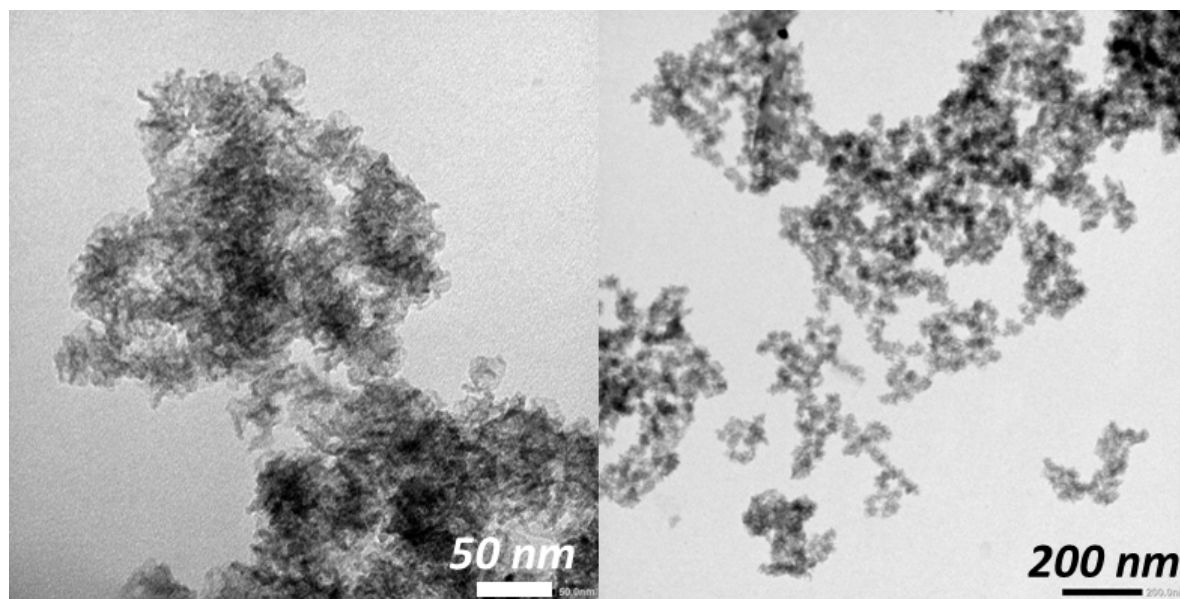

**Fig. S8** TEM images of o-Ph@ST-H.

---

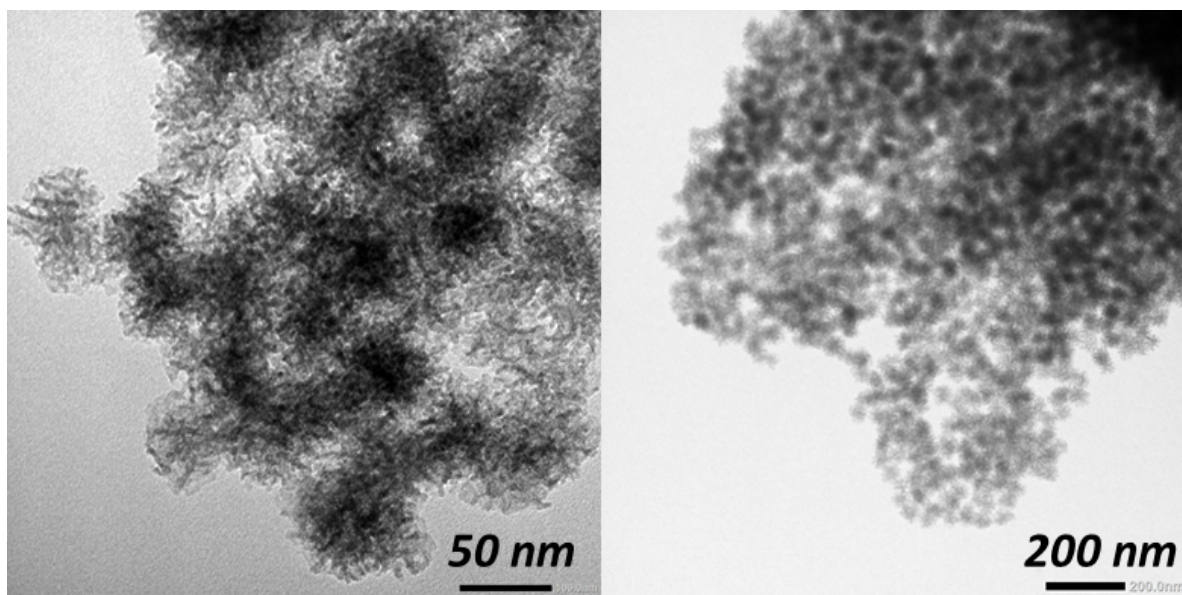

**Fig. S9** TEM images of o-[0.01MB/Ph]@ST-H.

---

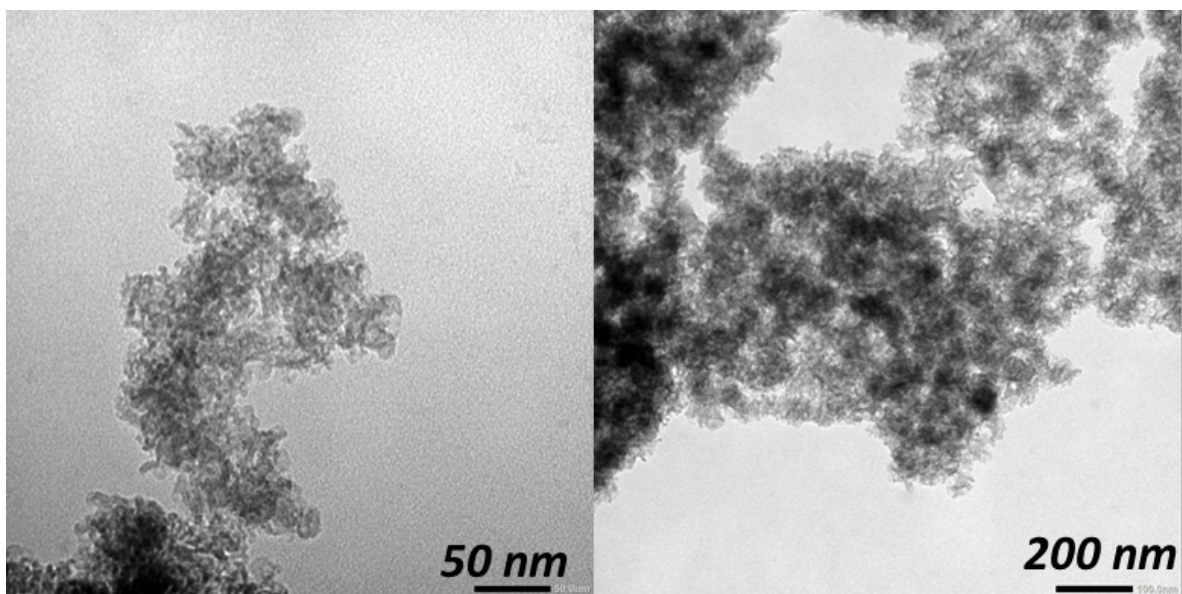

**Fig. S10** TEM images of p,o-[0.01MB/Ph]@ST-H.

---



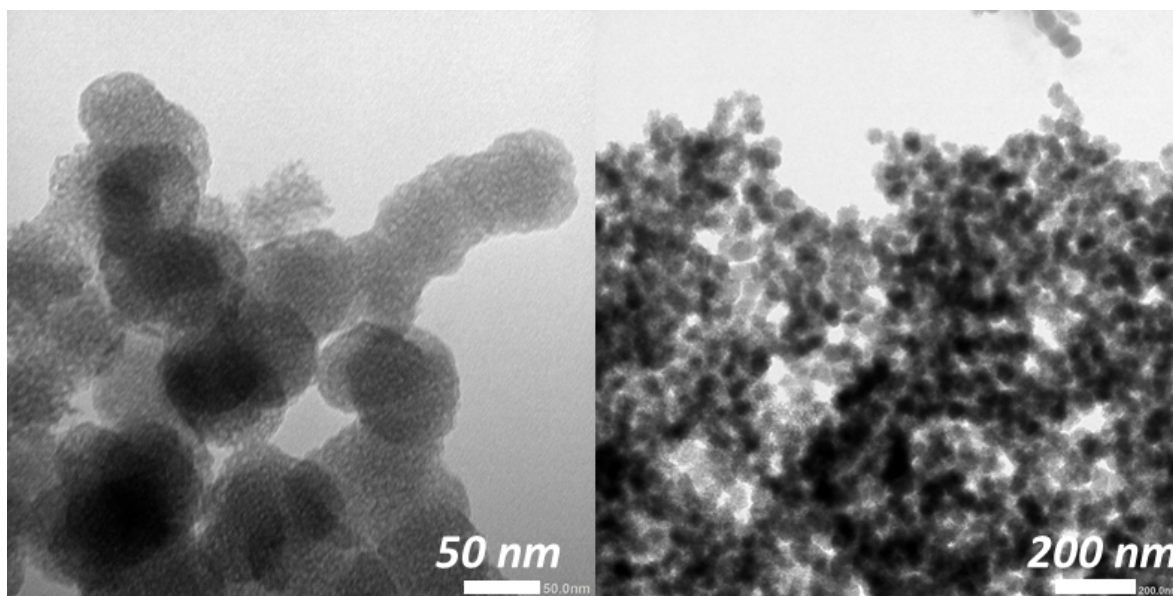

**Fig. S11** TEM images of p-MB@ST<sup>c</sup>.

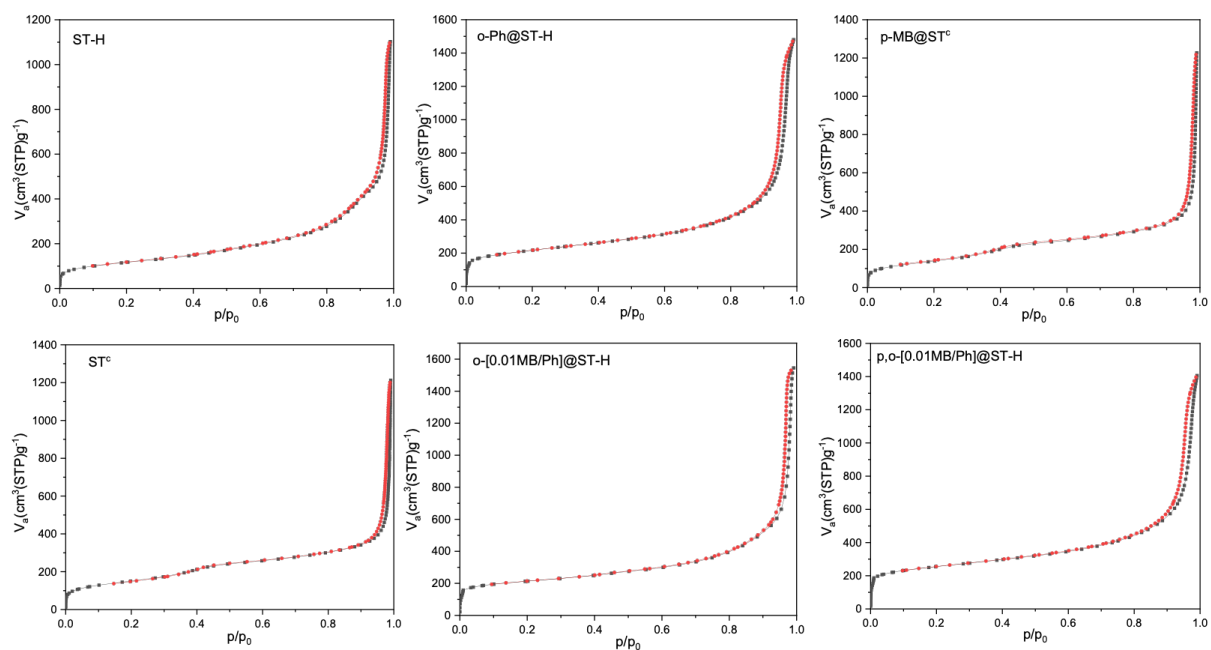

**Fig. S12** Nitrogen sorption isotherms at 77 K of ST-H, ST<sup>c</sup>, o-Ph@ST-H, o-[0.01MB/Ph]@ST-H, p-MB@ST<sup>c</sup> and p,o-[0.01MB/Ph]@ST-H (See Table S2).

**Pade Laplace** Acquisition: Continuous (Intensity) 00:02:15 24.99 °C

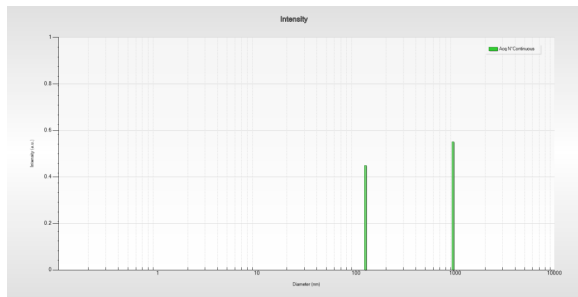

**Dispersion statistics**  
 Di 10%: 123.7 nm Di 50%: 946.03 nm Di 90%: 946.03 nm  
 Mean Size(Intensity): 576.47 nm Average count rate: 1656 kcps

Detected size(s)

| Size (nm) | Intensity | Decay Rate | Diffusion Coeff. (m <sup>2</sup> /s) |
|-----------|-----------|------------|--------------------------------------|
| 122.83    | 0.43      | 3378.08    | 64.78055E-013                        |
| 956.47    | 0.53      | 433.82     | 83.19204E-014                        |

**Pade Laplace** Acquisition: Continuous (Number) 00:02:15 24.99 °C

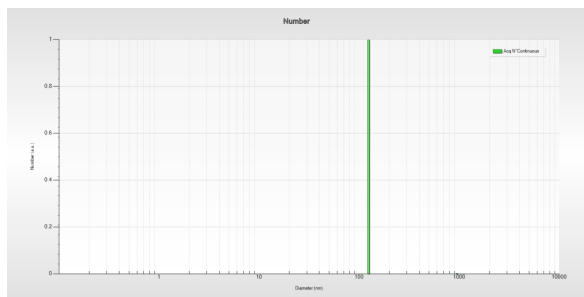

**Dispersion statistics**  
 Dn 10%: 123.7 nm Dn 50%: 123.7 nm Dn 90%: 123.7 nm  
 Mean Size(Number): 124.66 nm

Detected size(s)

| Size (nm) | Number | Decay Rate | Diffusion Coeff. (m <sup>2</sup> /s) |
|-----------|--------|------------|--------------------------------------|
| 122.83    | 1      | 3378.08    | 64.78055E-013                        |

**SBL** Acquisition: Continuous (Number) 00:02:15 24.99 °C

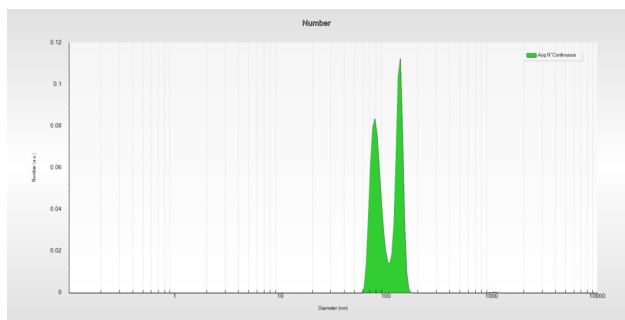

**Distribution statistics**  
 Dn 10%: 71.02 nm Dn 50%: 98.17 nm Dn 90%: 142.11 nm  
 Mean Size(Number): 106.05 nm  
 Solution index: 8

Peak : 1 Mode: 77.91 nm Mean: 80.99 nm Std Dev: 12.91 % Intensity: 53.6 %  
 Peak : 2 Mode: 135.68 nm Mean: 132.33 nm Std Dev: 8.82 % Intensity: 46.4 %

**Fig. S13** DLS analysis of o-[0.01MB/Ph]@ST-H in methanol.



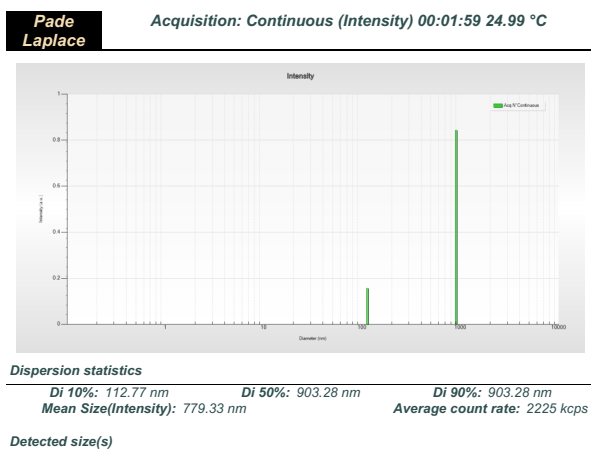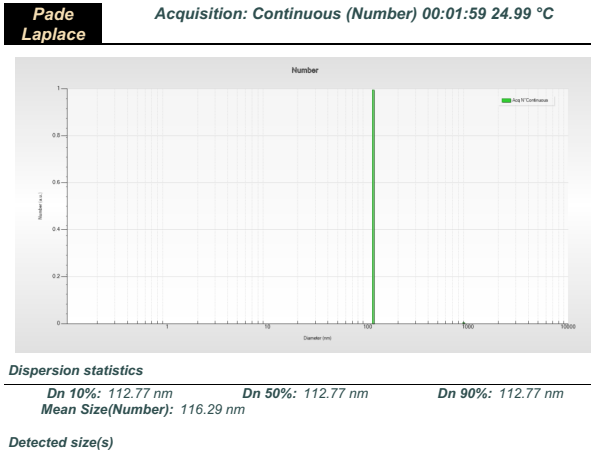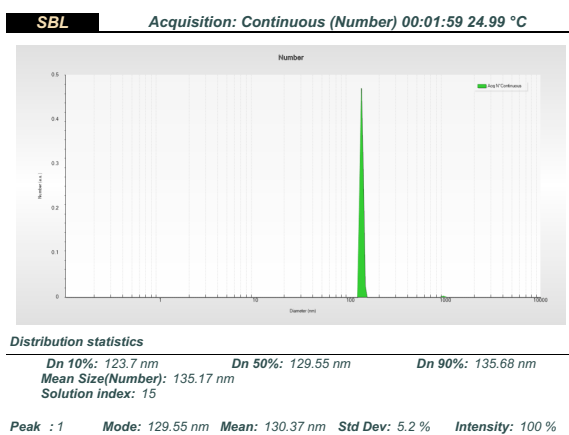

**Fig. S14** DLS analysis of p-MB@ST<sup>c</sup> in methanol.

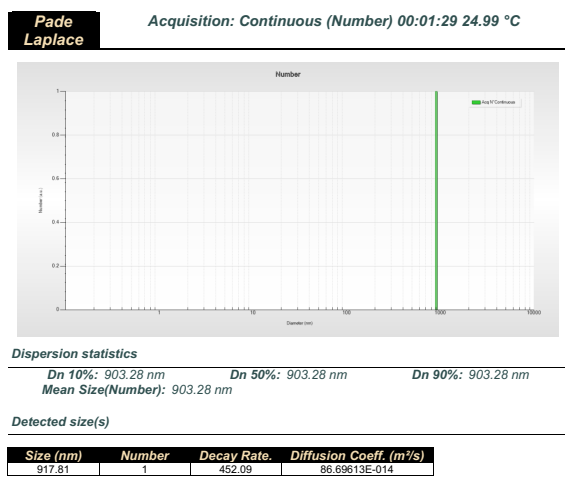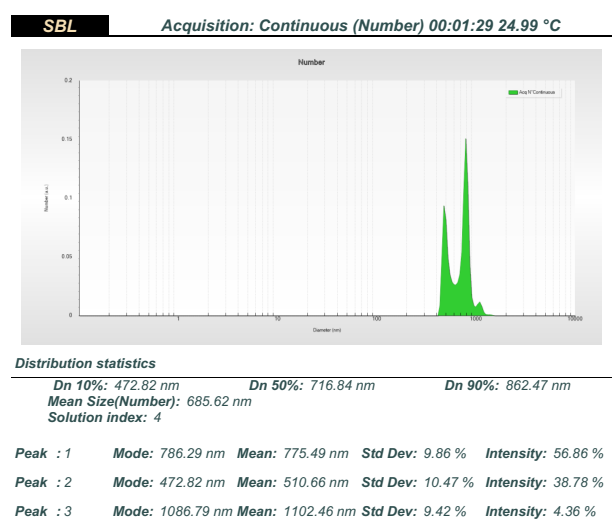

**Fig. S15** DLS analysis of p,o-[0.01MB/Ph]@ST-H in methanol.

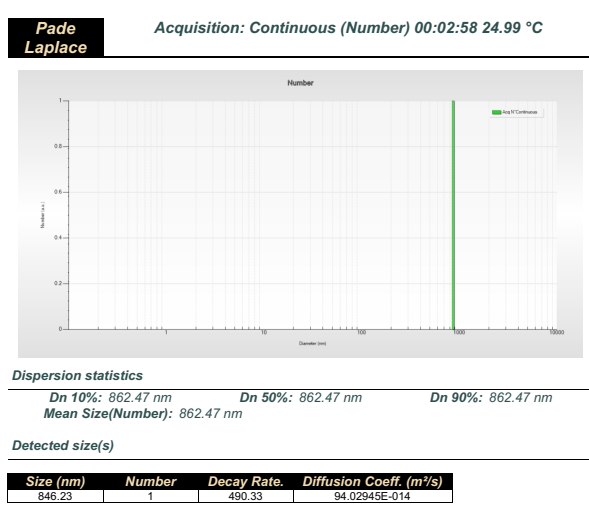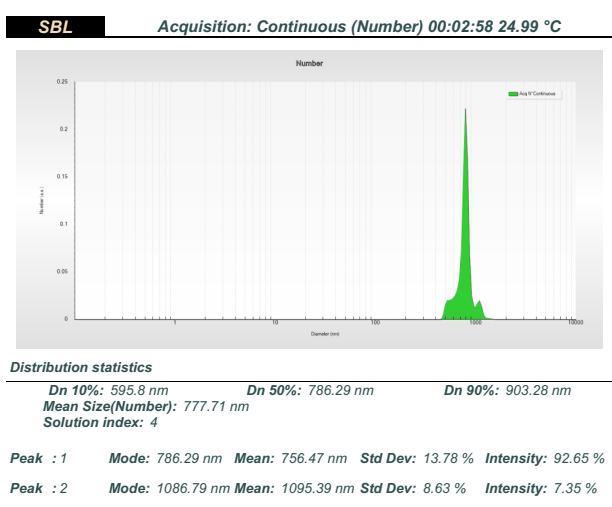

**Fig. S16** DLS analysis of o-Ph@ST-H in methanol.

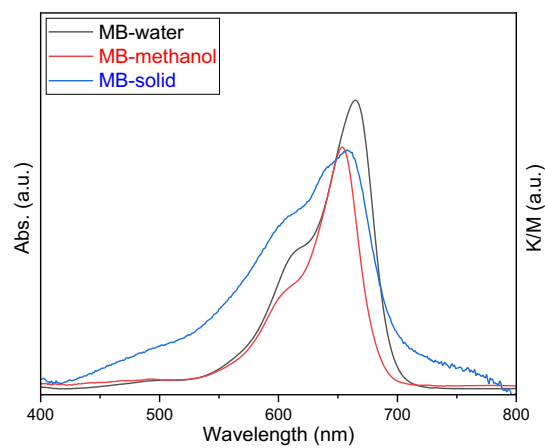

**Fig. S17** UV-visible spectra of methylene blue in aqueous solution (black line), in methanol (blue line) and in solid state (red line).

---

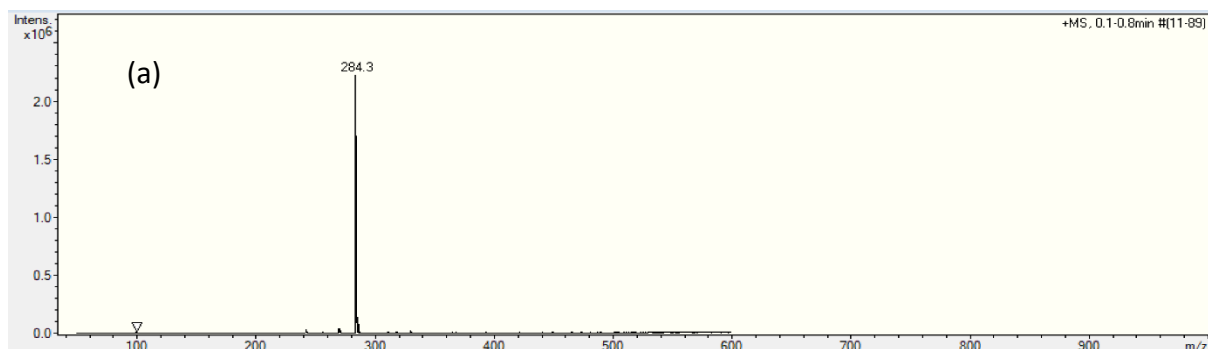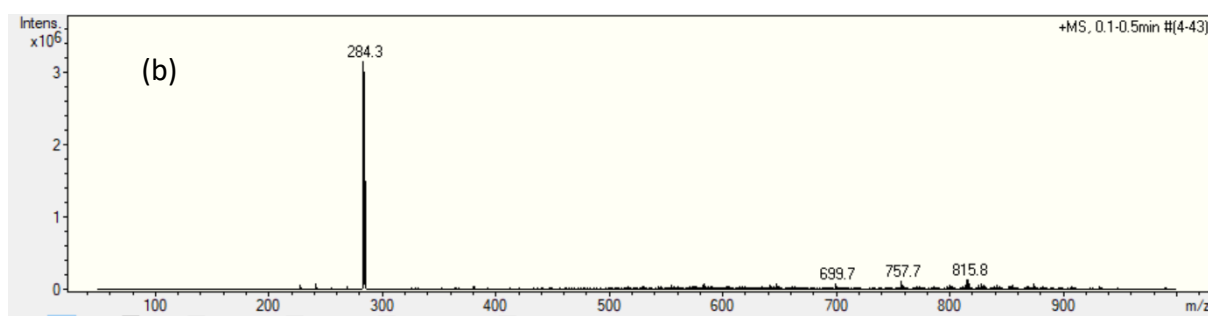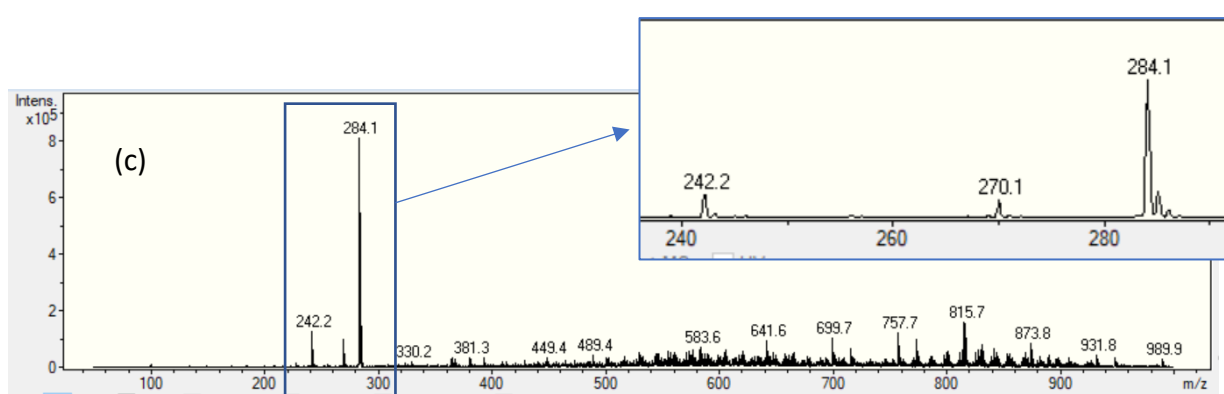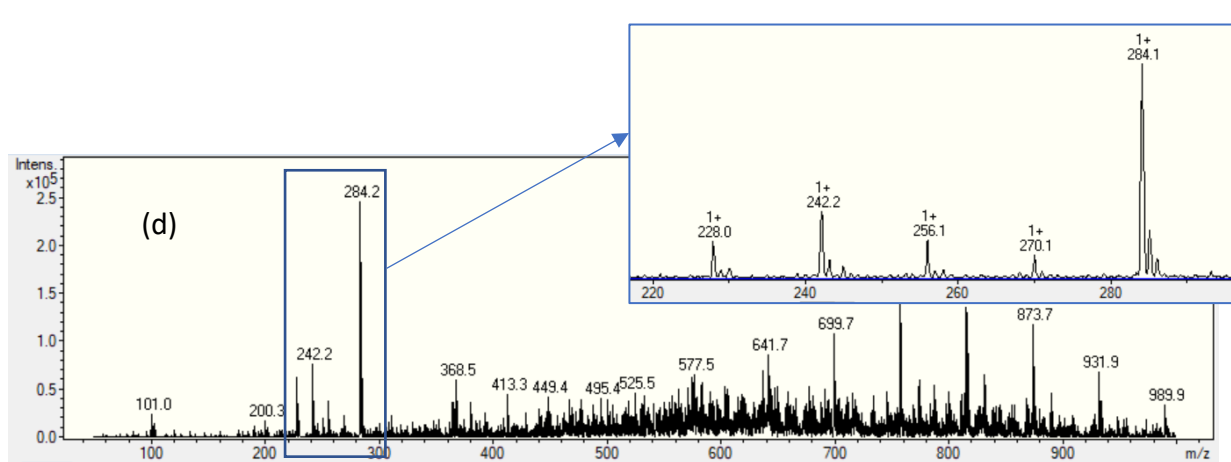

**Fig. S18** ESI-MS spectra registered in methanol solution for (a) bare MB, (b) o-[0.01MB/Ph]@ST-H, (c) p,o-[0.01MB/Ph]@ST-H and (d) p-MB @ST<sup>c</sup>.

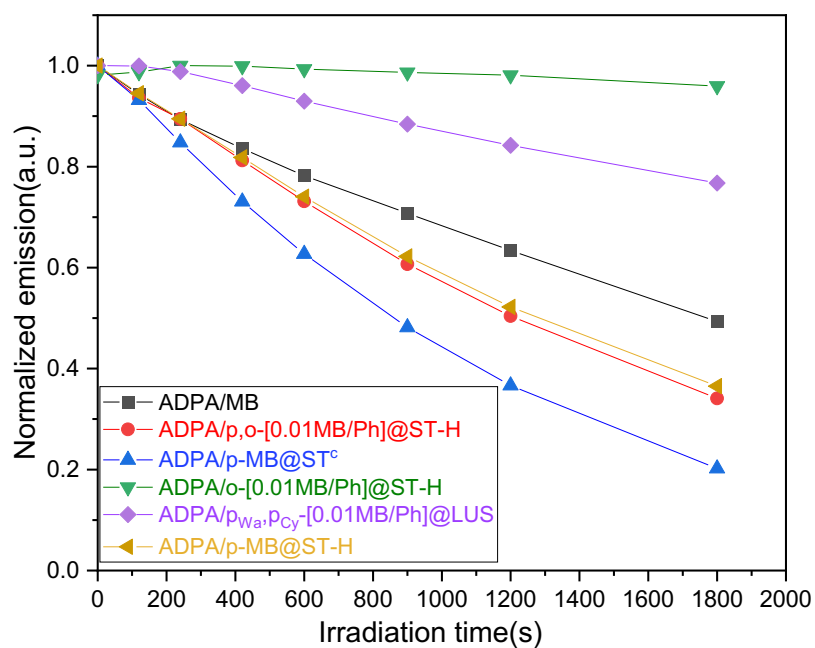

**Fig. S19** Time following of the ADPA luminescence ( $\lambda_{em} = 409$  nm) decay as a function of irradiation time of different MB-containing samples,  $\lambda_{ex} = 358$  nm in MeOH.

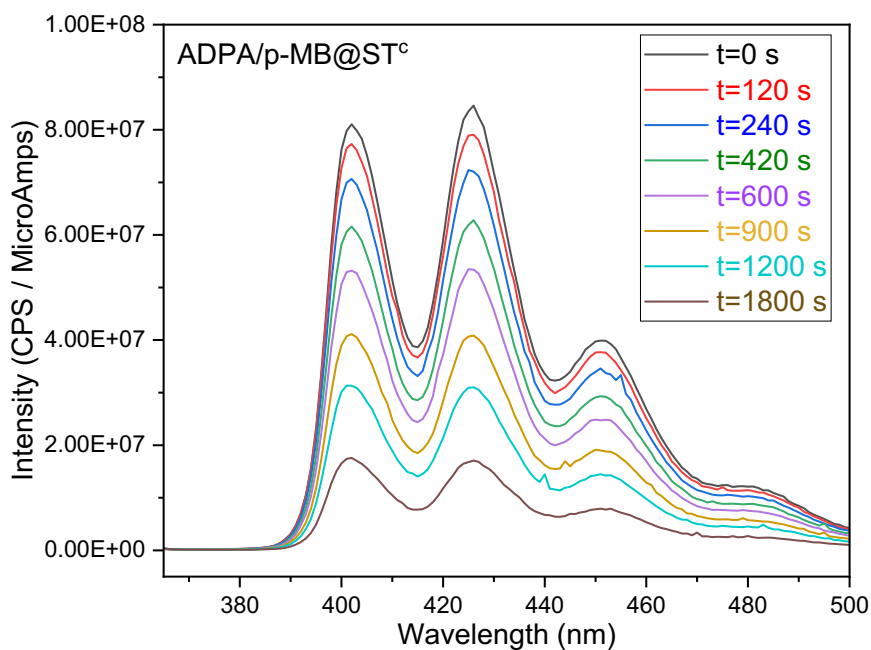

**Fig. S20** Emission spectra for ADPA/p-MB@ST<sup>c</sup> sample after different irradiation times  $\lambda_{ex} = 358$  nm, solvent = MeOH.

# Tables

**Table S1. ICP and TGA analyses of selected samples**

| sample               | ICP    | TGA                |          |               |          | % of MB <sup>+</sup> Cl <sup>+</sup> trihydrate vs. Si <sub>inorg</sub> <sup>(b)</sup> | % of Ph-SiH <sub>3</sub> vs. Si <sub>inorg</sub> |
|----------------------|--------|--------------------|----------|---------------|----------|----------------------------------------------------------------------------------------|--------------------------------------------------|
|                      | % of C | % loss 200 °C      | % C (MB) | % loss 600 °C | % C (Ph) |                                                                                        |                                                  |
| o-Ph@ST-H            | 6.67   |                    |          | 7.25          | 6.78     |                                                                                        | 11.40                                            |
| o-[0.01MB/Ph]@ST-H   | 1.47   | 2.09               | 1.41     |               |          | 2.75                                                                                   |                                                  |
| p-MB@ST <sup>c</sup> | 0.83   | 1.2 <sup>(a)</sup> | 0.81     |               |          | 1.58                                                                                   |                                                  |
| p,o-[0.01MB/Ph]@ST-H | 6.76   | 0.8 <sup>(a)</sup> | 0.54     | 7.31          | 6.83     | 1.05                                                                                   | 11.41                                            |

(a) estimated value from TGA curve; (b) Si<sub>inorg</sub> corresponds to silicon from the matrix, in contrast to Si<sub>org</sub> that is the silicon apported by the organosilane, here the phenylsilane

## Comments on Table S1

For o-Ph@ST-H, the amount of carbon found by ICP (6.67%) is very close to that calculated from TGA (6.77%), and corresponds exclusively to silane-attached phenyl functions (overall, as inferred from TGA, 11.4% in weight of Ph-silane is present in the final inorganic silica matrix). As expected, a slightly higher carbon content (6.76%) was found by ICP for o,p-[0.01MB/Ph]@ST-H, where o-Ph@ST-H nanoparticles were used as support to attach MB in a post-synthesis procedure. The additional carbon content comes presumably from the grafted MB, though the low 0.09% difference precludes a precise quantification in this case. TGA analysis of p,o-[0.01MB/Ph]@ST-H sample yielded a somewhat higher overall carbon content (7.37%) but still of the same order of magnitude.

Concerning the p-MB@ST<sup>c</sup> sample, where calcination was carried out before the incorporation of MB, a much lower carbon percent of 0.83% was measured in ICP. This value is in good agreement with that calculated from TGA (0.81%) and certainly corresponds to MB. Finally, the one-pot o-[0.01MB/Ph]@ST-H sample presents a completely unexpected behaviour since no significant amounts of Ph functions were found at 600 °C in TGA analysis (see main text), whereas a mass loss of 2.09 % is observed around 200 °C. Assuming that this mass loss corresponds to MB<sup>+</sup> cations, the calculated carbon percent is 1.41%, which is consistent with the 1.47% found in ICP.

**Table S2. Porous volume deduced for the N<sub>2</sub> sorption isotherms at p/p<sup>o</sup> = 0.9 (g.mL<sup>-1</sup>)**

|                      |     |
|----------------------|-----|
| ST-H                 | 1.4 |
| ST <sup>c</sup>      | 1.2 |
| o-Ph@ST-H            | 2.1 |
| o-[0.01MB/Ph]@ST-H   | 2.1 |
| p-MB@ST <sup>c</sup> | 1.3 |
| p,o-[0.01MB/Ph]@ST-H | 1.9 |
